# Supplementary material for: Significant source of secondary aerosol: formation from gasoline evaporation emissions in the presence of SO 2 and NH 3
Source: Copernicus journal article supplement (doi:10.5194/acp-2019-14), 2019-01-16
Supplement: Supplementary file [file acp-2019-14-AC2-supplement.pdf]

## Responses to Referee #2's comments

**General comment:** Chen et al. propose a study presenting the impact of NH<sub>3</sub> and SO<sub>2</sub> on secondary organic aerosol formation produced from the oxidation of unburned gasoline vapors. While this study presents interesting results, some aspects (see comments below) remain unclear and/or should be better discussed. One of my main comment is the relevance of the mix of VOC studied in this work when the authors claimed to study relevant unburned gasoline vapors. Indeed, the emission inventory proposed by Liu et al appears very different than the mix of VOC employed in this work. Overall this can lead to an overestimation of the importance of this potential SOA source.

**Response:** Many thanks for your constructive comments and valuable suggestions, which would be much helpful to improve the scientific merits of this manuscript. The concerns raised by you have been carefully addressed in the revised manuscript.

**Response to your main comment:** In our study, the utilized gasoline vapors were also dominated by alkanes (C<sub>6</sub> to C<sub>12</sub>, such as methylcyclopentane (C<sub>6</sub>H<sub>12</sub>) and methylcyclohexane (C<sub>7</sub>H<sub>14</sub>)), which made up a 65.1 % share. These alkanes were also detected by Liu et al., 2017 and previous studies (Liu et al., 2008; Zhang et al., 2013), and also accounting for a certain proportion in evaporative emission. As for those short chain alkanes (e.g., i-pentane, n-butane and i-butane) reported by Liu et al., 2017, they should also be in our gasoline vapors according to their relative high vapor pressure, while they could not be detected by our GC-MS system due to the separation capacity of the GC column.

Previous studies have reported that long-chain (C6 to C19) alkanes, which are intermediate volatility organic compounds (IVOCs) (Donahue et al., 2006), could also contribute to SOA formation (Pye and Pouliot, 2012; Tkacik et al., 2012; Presto et al., 2009; Lim and Ziemann, 2005; Zhao et al., 2016). In order to relatively accurately predict the contribution of vehicle evaporative emissions to secondary aerosols, the lower aromatics content (~ 10%) and long-chain alkanes in vehicular evaporative emissions was considered (Zhang et al., 2013) and discussed in the revised manuscript. Additionally, we agree that there might be some differences between the VOCs composition of gasoline vapors directly injected to the smog chamber and vehicular evaporative emissions. Thus, further work should be focused on SA formation directly from vehicular evaporative emissions to shed light on the formation mechanism of SA under more atmospherically relevant conditions.

**Revision in the manuscript:**

**Lines 91-95, Add:** “In addition to short-chain alkanes, a certain proportion of aromatics and alkanes (C6 to C12) were also contained in the evaporative emissions (Liu et al., 2008; Zhang et al., 2013). Previous studies have reported that aromatics and long-chain (C6 to C19) alkanes, which are intermediate volatility organic compounds (IVOCs) (Donahue et al., 2006), could contribute to SOA formation (Pye and Pouliot, 2012; Tkacik et al., 2012; Lim and Ziemann, 2005).”

**Line 109, Add:** “65.1 % (v/v) alkanes (C6 to C12),”

**Line 206, Add:** “, methylcyclopentane, methylcyclohexane”

**Lines 452-460, Change** “Considering the typical concentrations of SO<sub>2</sub> and NH<sub>3</sub> of 40

ppb and 23 ppb in haze pollution in the north China plain (Cheng et al., 2016), the SA yield is roughly estimated to be about 0.3. Then, the SA formed from the photo-oxidation of VOCs emitted by vehicular evaporation in the presence of SO<sub>2</sub> and NH<sub>3</sub> is roughly estimated to be 0.49 Tg yr<sup>-1</sup>, which is about twice as much as the primary PM<sub>2.5</sub> emissions from transportation (0.21 Tg in 2007) in China (Jing et al., 2015; Zhang et al., 2007).” To “Considering the typical concentrations of SO<sub>2</sub> and NH<sub>3</sub> of 40 ppb and 23 ppb in haze pollution in the north China plain (Cheng et al., 2016), and the lower aromatics content (~ 10%) in vehicular evaporative emissions (Zhang et al., 2013), the SA yield is roughly estimated to be about 0.20. Recently, an updated emission inventory of vehicular evaporative emissions was reported to be 1.65 Tg yr<sup>-1</sup> (Liu et al., 2017a). Then, the SA formed from the photo-oxidation of VOCs emitted by vehicular evaporation in the presence of SO<sub>2</sub> and NH<sub>3</sub> is roughly estimated to be 0.33 Tg yr<sup>-1</sup>, which is about 1.5 times as much as the primary PM<sub>2.5</sub> emissions from transportation (0.21 Tg yr<sup>-1</sup>) in China (Jing et al., 2015; Zhang et al., 2007) and accounting for about 21 % of the SOA production (1.6 Tg yr<sup>-1</sup>) from anthropogenic precursors estimated by global chemical transport model (Farina et al., 2010).”

**Lines 476-480, Add:** “Additionally, there might be some differences between the VOCs composition of gasoline vapors directly injected to the smog chamber and vehicular evaporative emissions. Thus, further work should be focused on SA formation directly from vehicular evaporative emissions under coexisting SO<sub>2</sub> and NH<sub>3</sub> conditions to shed light on the formation mechanism of SA under more atmospherically relevant conditions.”

**Comment 1:** Lines 49-53: If the highest concentrations of NH<sub>3</sub> were observed in urban areas, is the main source from agriculture or vehicle emissions?

**Response:** Thank you very much. This concentrations of NH<sub>3</sub> were reported by Ianniello et al. (2010), who carried out the intensive measurements in the campus of Peking University (PKU), located at North of Beijing (39°59'23" N, 116°18'19" E), China. And the highest NH<sub>3</sub> concentrations in summer were mainly from agricultural activity and fertilizer use, which were regionally transported from south and southeast of Beijing, while could not exclude the influence by traffic emissions at local Beijing. The moderate correlations were obtained between NH<sub>3</sub> and pollutants mainly emitted by motor-vehicle exhausts, such as NO<sub>x</sub>, and CO, indicating an influence by traffic emissions. Recently studies have reported that the contribution of traffic emissions to NH<sub>3</sub> had an ascend trend accompanied the increasing urban population and the introduction of vehicles three-way catalytic converters (Pan et al., 2016; Kang et al., 2016).

**Revision in the manuscript:**

**Lines 54-56, Add** “, which mainly derived from the regionally transportation of agricultural activity and fertilizer use, while could not exclude the influence by traffic emissions at local Beijing (Pan et al., 2016; Kang et al., 2016).”

**Comment 2:** Lines 66-70: Split the references and cite proper references. For instance, the work from Kamens and al. should be better acknowledged.

**Response:** Thanks for your valuable suggestion. The references have been split, and

the proper references have been cited in the revised manuscript.

**Revision in the manuscript:**

**Lines 70-71, Add** “Jang and Kamens (2001) first reported the acid-catalytical effect of acidic H<sub>2</sub>SO<sub>4</sub> on the oxidation of atmospheric carbonyls.”

**Lines 71-76, Change** “It has been found that SO<sub>2</sub> promotes SA formation from typical biogenic (e.g., isoprene and  $\alpha$ -pinene) and anthropogenic (e.g., toluene, o-xylene, 1,3,5-trimethylbenzene, and gasoline vehicle exhaust) precursors through acid-catalyzed reactions (Chu et al., 2016; Liu et al., 2016; Lin et al., 2013; Santiago et al., 2012; Jaoui et al., 2008; Kleindienst et al., 2006; Edney et al., 2005)” **to:** “And the promotion effect of SO<sub>2</sub> were further found on the SA formation from typical biogenic (e.g., isoprene and  $\alpha$ -pinene) (Lin et al., 2013; Jaoui et al., 2008; Kleindienst et al., 2006; Edney et al., 2005) and anthropogenic (e.g., toluene, o-xylene, 1,3,5-trimethylbenzene, and gasoline vehicle exhaust) precursors (Chu et al., 2016; Liu et al., 2016; Santiago et al., 2012) through acid-catalyzed heterogeneous reactions (Jang et al., 2002; Jang et al., 2003a, b; Czoschke et al., 2003)”

**Comment 3:** Lines 83-86: The authors should better discuss this section and not overestimate the potential of VTE in producing aerosols. According to Liu et al., 2017, the VOC emitted from the evaporation are mainly dominated by short chain alkane (e.g., Pentane, butane,...) which have a very limited impact on SOA formation. However, the authors mainly discussed/focused on the oxidation of aromatics. In addition, important papers are missing and should be discussed; e.g., Pye and Pouliot 2012, Tkacik et al.,

2012.

**Response:** Thanks for your valuable suggestion. In our study, the utilized gasoline vapors were also dominated by alkanes (C6 to C12), which made up a 65.1 % share. These alkanes were also detected by Liu et al., 2017 and previous studies (Liu et al., 2008; Zhang et al., 2013), and also accounting for a certain proportion in evaporative emission. The time variations of long-chain alkanes (methylcyclopentane and methylcyclohexane) in photo-oxidation of gasoline/NO<sub>x</sub> in the presence or absence of SO<sub>2</sub> and NH<sub>3</sub> have been added in Fig. S3 in the Supplement (shown in Fig. R1). As for those short chain alkanes (e.g., i-pentane, n-butane and i-butane) reported by Liu et al., 2017, they should also be in our gasoline vapors according to their relative high vapor pressure, while they could not be detected by our GC-MS system due to the separation capacity of the GC column.

Previous studies have reported that long-chain (C6 to C19) alkanes, which are intermediate volatility organic compounds (IVOCs) (Donahue et al., 2006), could also contribute to SOA formation (Pye and Pouliot, 2012; Tkacik et al., 2012; Presto et al., 2009; Lim and Ziemann, 2005; Zhao et al., 2016). In order to relatively accurately predict the contribution of vehicle evaporative emissions to secondary aerosols, the lower aromatics content (~ 10%) and long-chain alkanes in vehicular evaporative emissions was considered (Zhang et al., 2013) and discussed in the revised manuscript. Additionally, we agree that there might be some differences between the VOCs composition of gasoline vapors directly injected to the smog chamber and vehicular evaporative emissions. Thus, further work should be focused on SA formation directly

from vehicular evaporative emissions to shed light on the formation mechanism of SA under more atmospherically relevant conditions.

**Revision in the manuscript:**

**Lines 91-95, Add:** “In addition to short-chain alkanes, a certain proportion of aromatics and alkanes (C6 to C12) were also contained in the evaporative emissions (Liu et al., 2008; Zhang et al., 2013). Previous studies have reported that aromatics and long-chain (C6 to C19) alkanes, which are intermediate volatility organic compounds (IVOCs) (Donahue et al., 2006), could contribute to SOA formation (Pye and Pouliot, 2012; Tkacik et al., 2012; Lim and Ziemann, 2005).”

**Line 109, Add:** “65.1 % (v/v) alkanes (C6 to C12),”

**Line 206, Add:** “, methylcyclopentane, methylcyclohexane”

**Lines 452-460, Change** “Considering the typical concentrations of SO<sub>2</sub> and NH<sub>3</sub> of 40 ppb and 23 ppb in haze pollution in the north China plain (Cheng et al., 2016), the SA yield is roughly estimated to be about 0.3. Then, the SA formed from the photo-oxidation of VOCs emitted by vehicular evaporation in the presence of SO<sub>2</sub> and NH<sub>3</sub> is roughly estimated to be 0.49 Tg yr<sup>-1</sup>, which is about twice as much as the primary PM<sub>2.5</sub> emissions from transportation (0.21 Tg in 2007) in China (Jing et al., 2015; Zhang et al., 2007).” **To** “Considering the typical concentrations of SO<sub>2</sub> and NH<sub>3</sub> of 40 ppb and 23 ppb in haze pollution in the north China plain (Cheng et al., 2016), and the lower aromatics content (~ 10%) in vehicular evaporative emissions (Zhang et al., 2013), the SA yield is roughly estimated to be about 0.20. Recently, an updated emission inventory of vehicular evaporative emissions was reported to be 1.65 Tg yr<sup>-1</sup> (Liu et al., 2017a).

Then, the SA formed from the photo-oxidation of VOCs emitted by vehicular evaporation in the presence of SO<sub>2</sub> and NH<sub>3</sub> is roughly estimated to be 0.33 Tg yr<sup>-1</sup>, which is about 1.5 times as much as the primary PM<sub>2.5</sub> emissions from transportation (0.21 Tg yr<sup>-1</sup>) in China (Jing et al., 2015; Zhang et al., 2007) and accounting for about 21 % of the SOA production (1.6 Tg yr<sup>-1</sup>) from anthropogenic precursors estimated by global chemical transport model (Farina et al., 2010).”

**Lines 460-462, Add:** “In addition, the photo-oxidation of long-chain alkanes (> C<sub>6</sub>, IVOCs) contained in evaporative emissions would also contribute to SOA formation (Pye and Pouliot, 2012; Tkacik et al., 2012; Presto et al., 2009; Lim and Ziemann, 2005; Zhao et al., 2016).”

**Lines 476-480, Add:** “Additionally, there might be some differences between the VOCs composition of gasoline vapors directly injected to the smog chamber and vehicular evaporative emissions. Thus, further work should be focused on SA formation directly from vehicular evaporative emissions under coexisting SO<sub>2</sub> and NH<sub>3</sub> conditions to shed light on the formation mechanism of SA under more atmospherically relevant conditions.”

Fig. R1 has been added in the Supplement.



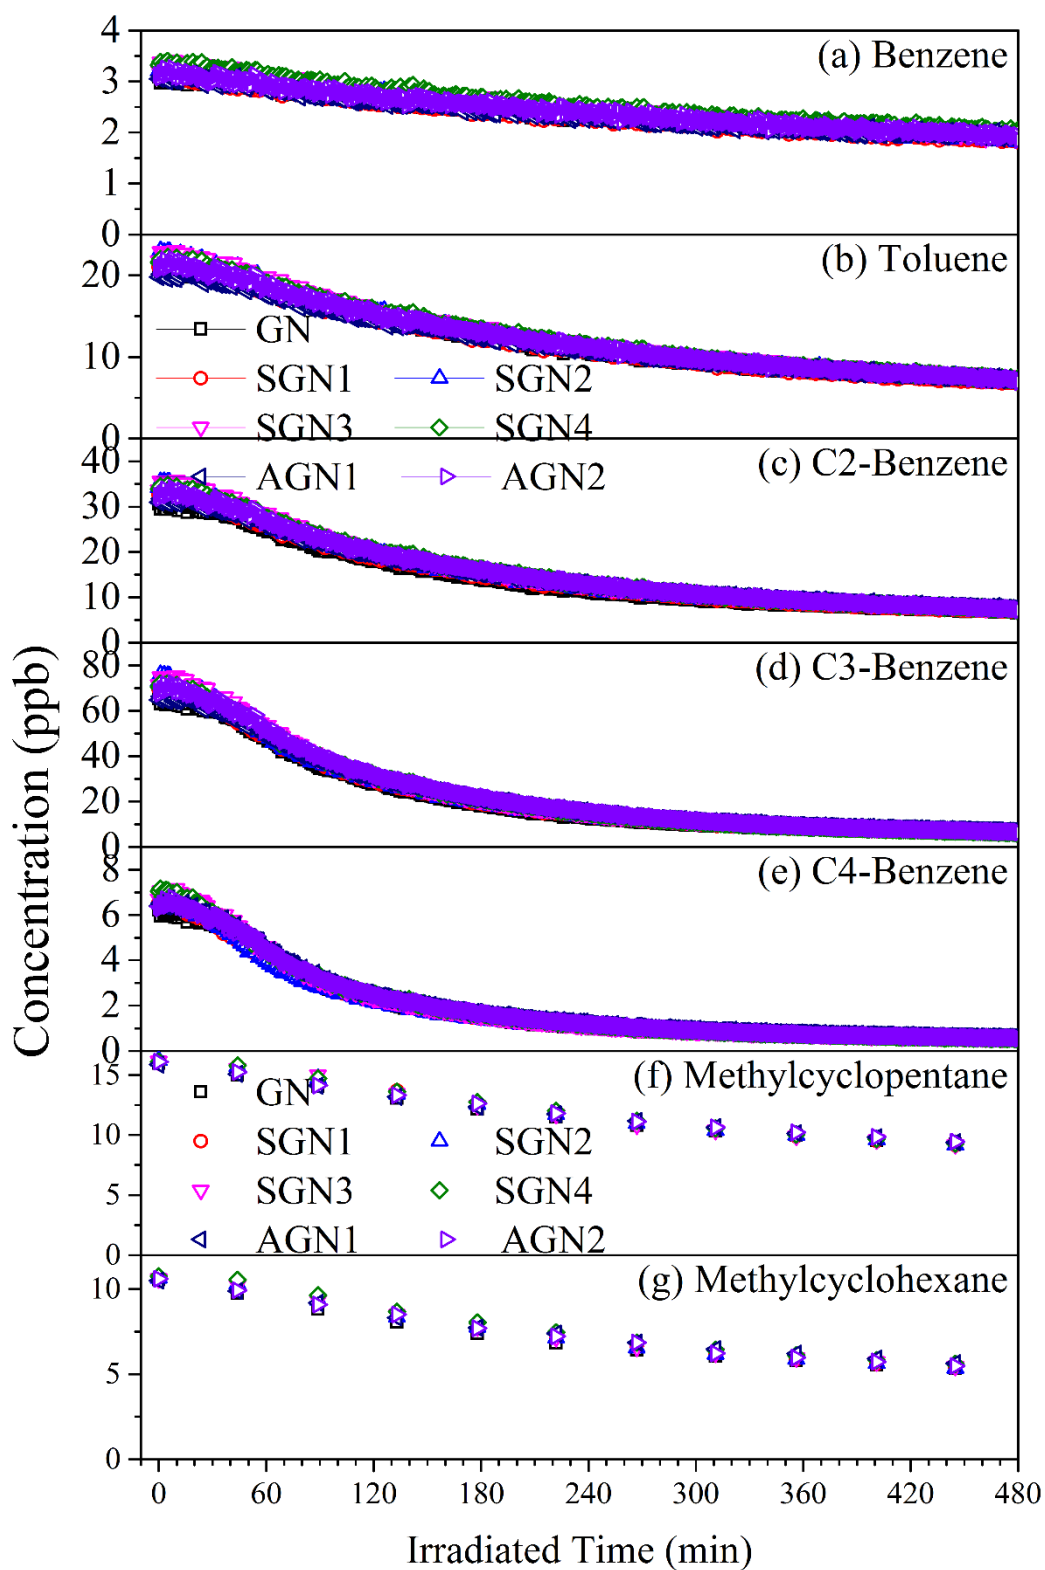

Fig. R1. Time variations of organic gas-phase species (a) Benzene, (b) Toluene, (c) C2-Benzene, (d) C3-Benzene, (e) C4-Benzene, (f) Methylcyclopentane, and (g) Methylcyclohexane in photo-oxidation of gasoline/NO<sub>x</sub> in the presence or absence of SO<sub>2</sub> and NH<sub>3</sub>. Letters in abbreviations represent the reactants introduced into the chamber reactor, i.e., “G” represents gasoline, “N” represents nitrogen oxides, “S” represents sulfur dioxide, “A” represents ammonia.

**Comment 4:** Lines 121-122: Please change to the widely used acronym (PTR-TOF), (i.e., Yuan et al., 2017 Chem Review).

**Response:** Thanks for your suggestion. HR-ToF-PTRMS has been changed to PTR-TOF in the revised manuscript.

**Revision in the manuscript:**

**Lines 131-132, Change** “high-resolution time-of-flight proton transfer reaction mass spectrometry (HR-ToF-PTRMS)” **To** “proton-transfer-reaction time of flight mass spectrometry (PTR-TOF)”

**Line 133, Add reference** “Yuan et al., 2017”

**Line 207, Change** “HR-ToF-PTRMS” **To** “PTR-TOF”

**Comment 5:** Lines 130-131: Is the density comparable to other studies?

**Response:** Thanks for your comment. Many previous studies have demonstrated that PM effective density could be estimated by comparing mobility diameter from the DMA (i.e.,  $d_m$ ) and vacuum aerodynamic diameter from an Aerodyne AMS (i.e.,  $d_{va}$ ) in parallel, i.e.,  $\rho = d_{va}/d_m$  (Jimenez et al., 2003a, b; DeCarlo et al., 2004; Bahreini et al., 2005; Alfarra et al., 2006; Ng et al., 2007; Sato et al., 2010). According to this equation, the density of PM was calculated to be 1.5–1.6 g cm<sup>-3</sup>, which was in the range of density of SOA derived from aromatic hydrocarbons (1.24–1.48 g cm<sup>-3</sup>) (Sato et al., 2010) and ammonium nitrate (NH<sub>4</sub>NO<sub>3</sub>, 1.72 g cm<sup>-3</sup>) (Bahreini et al., 2005) and could be comparable with the previous studies (Li et al., 2018).

**Revision in the manuscript:**

**Lines 141-143, Add** “, which was in the range of density of SOA derived from aromatic hydrocarbons (1.24–1.48 g cm<sup>-3</sup>) (Sato et al., 2010) and ammonium nitrate (NH<sub>4</sub>NO<sub>3</sub>, 1.72 g cm<sup>-3</sup>) (Bahreini et al., 2005) and could be comparable with the previous studies (Li et al., 2018)”

**Comment 6:** Lines 191-192: The authors should be careful here. The PTR can measure a certain (small) subset of OVOC produced from a given reaction. Therefore, it is not because the analytical technique was not able to identify any significant differences that mean SO<sub>2</sub>/NH<sub>3</sub> did not significantly impact the gaseous phase. As an example, a large formation of H<sub>2</sub>SO<sub>4</sub> is mentioned in the paper. In addition, the authors should propose a more quantitative comparison (as realized with the AMS data) and not only briefly compare the mass spectra.

**Response:** Thanks for your valuable suggestion. The gas-phase intermediates, such as small molecule oxygenated VOCs (OVOC) (e.g., acetic acid) formed during the photo-oxidation of gasoline/NO<sub>x</sub> under different conditions have been discussed in the revised manuscript and added in the Supplement (shown in Fig. R2). The time series of acetic acid concentration measured by PTR-TOF showed a decreased trend in the presence of SO<sub>2</sub>, suggesting that the uptake of acetic acid might be enhanced. This phenomenon was consistent with those reported by Liggio and Li (2006), who observed that the uptake of organic compounds under acidic conditions would be enhanced significantly. Moreover, the presence of high concentrations of SO<sub>2</sub> would generate gaseous H<sub>2</sub>SO<sub>4</sub>, which would contribute to the formation of particle phase. Similarly, the concentration

of acetic acid also shown an obviously decreased trend in the presence of  $\text{NH}_3$ , which might be caused by the reaction of acid-base reaction or the uptake of acetic acid in the presence of  $\text{NH}_3$  (Liu et al., 2015).

**Revision in the manuscript:**

**Lines 214-224, Add:** “However, as for the gas-phase intermediates formed during the photo-oxidation of gasoline/ $\text{NO}_x$  under different conditions, such as small molecule oxygenated VOCs (OVOCs), which could also be measured by PTR-TOF. The time series of OVOCs concentration would vary with the concentration of  $\text{SO}_2$  and  $\text{NH}_3$ . For example, we observed that acetic acid concentration decreased with the increased concentration of  $\text{SO}_2$  (Fig. S5, in the Supplement), suggesting that the uptake of acetic acid may be enhanced. This phenomenon was consistent with those reported by Liggio and Li (2006), who observed that the uptake of organic compounds under acidic conditions would be enhanced significantly. Moreover, the presence of high concentrations of  $\text{SO}_2$  would generate gaseous  $\text{H}_2\text{SO}_4$ , which would contribute to the formation of particle phase, as discussed in the next section. Similarly, the concentration of acetic acid also shown an obviously decreased trend in the presence of  $\text{NH}_3$  (Fig. S5, in the Supplement), which could be caused by the reaction of acid-base reaction or the uptake of acetic acid in the presence of  $\text{NH}_3$  (Liu et al., 2015c).”

Fig. R2 has been added in the Supplement.

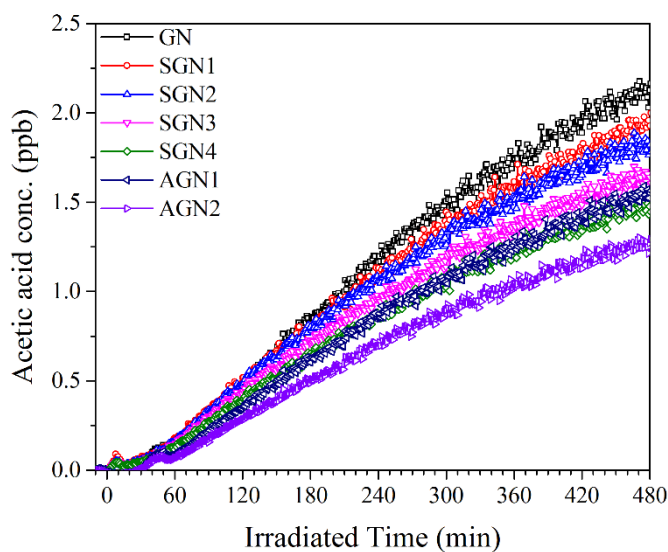

Fig. R2. Time variations of acetic acid during the photo-oxidation of gasoline/NO<sub>x</sub> in the presence or absence of SO<sub>2</sub> and NH<sub>3</sub>. Letters in abbreviations represent the reactants introduced into the chamber reactor, i.e., “G” represents gasoline, “N” represents nitrogen oxides, “S” represents sulfur dioxide, “A” represents ammonia.

**Line 210, Delete:** “In addition, the typical mass spectra of organic gas-phase species derived from HR-ToF-PTRMS after 480 min of the photo-oxidation reaction at different concentrations of SO<sub>2</sub> or NH<sub>3</sub> are shown in Fig. S5, and no significant differences were found. Therefore, it is reasonable to deduce that the presence of SO<sub>2</sub> or NH<sub>3</sub> did not significantly impact the initial gas-phase oxidation mechanism of gasoline. This was consistent with the previous study conducted by Chu et al. (2016), who found that the presence of SO<sub>2</sub> and NH<sub>3</sub> did not significantly impact the initial gas-phase oxidation of toluene in the presence of NO<sub>x</sub>.”

**Comment 7:** Line 206: The background of ammonia appears quite subsequent. Do the authors have an explanation? Is it an expected background in chamber experiments?

**Response:** Thanks for your comment. The background of NH<sub>3</sub> might be present in the

background air, it also might be introduced during the humidification process of the smog chamber. Similar phenomenon was reported by Liu et al. (2015), who found that the concentration of background  $\text{NH}_3$  in the dry chamber (9 m<sup>3</sup> chamber at Environment Canada) was consistently at ~5 ppb (after cleaning), while increasing to a reproducible ~35 ppb after humidifying to 50 % RH.

The background  $\text{NH}_3$  might also be derived from the partitioning of the deposited ammonium sulfate and ammonium nitrate on the chamber wall when humid air was introduced. Unfortunately, appropriate instruments are unavailable to measure the exact concentration of  $\text{NH}_3$  in the background air in the chamber.

**Revision in the manuscript:**

**Lines 322-323, Add** “or introduced during the humidification process of the chamber (Liu et al., 2015c)”

**Lines 323-324, Add** “Unfortunately, appropriate instruments are unavailable to measure the exact concentration of background  $\text{NH}_3$  in the chamber.”

**Comment 8:** Fig.3 the color scale is hard to read please modify it.

**Response:** Thanks for your suggestion. The color scale and the font size in Fig. 3 has been modified in the revised manuscript, as shown in Fig. R3.

**Revision in the manuscript:**

Fig. R3 has been modified in the revised manuscript.

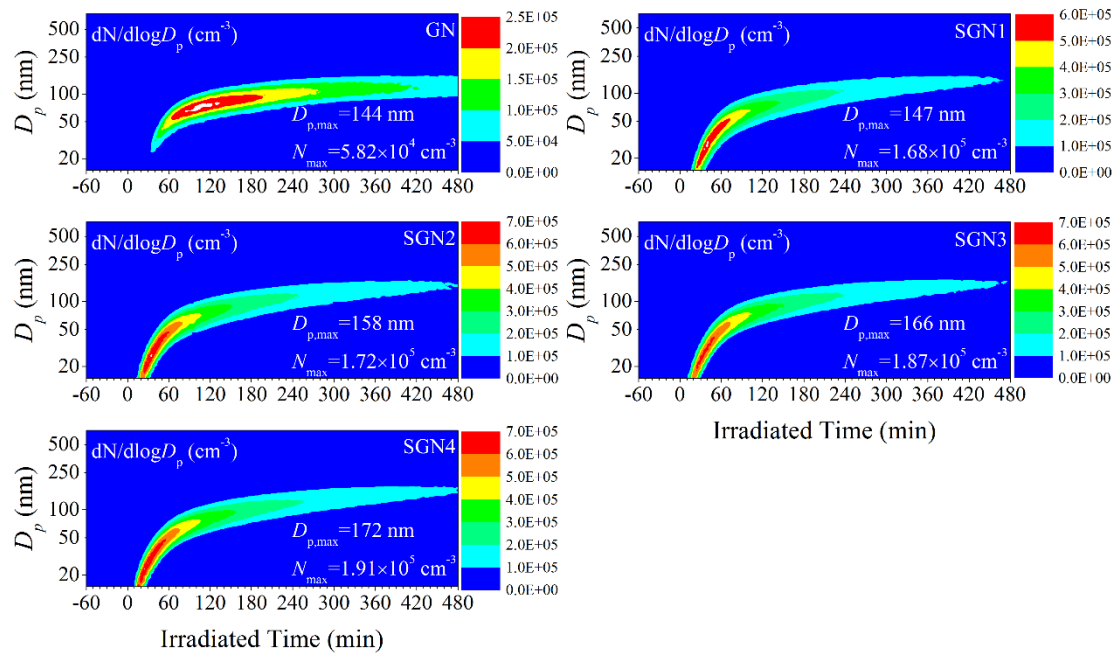

Fig. R3. Time series of the size distributions for the generated secondary aerosol during the photo-oxidation experiments with different  $\text{SO}_2$  initial concentrations (Exps. GN, SGN1, SGN2, SGN3, and SGN4).  $D_{p,\text{max}}$  and  $N_{\text{max}}$  represent the maximal diameter and number concentration of generated secondary aerosol, respectively, during each photo-oxidation experiment.

**Comment 9:** Lines 213-219: In this section, there are some inconsistencies with the literature. The number (i.e., up to 50 times more particles) reported in earlier studies are different than in the work proposed by Chen et al. However the concentration of  $\text{SO}_2$  and the precursors were similar. For example, while the  $\text{SO}_2$  concentration was multiplied by 4 the formation of particles didn't increase significantly. The authors should explain such discrepancy and discuss/compare their results to the existing literature.

**Response:** Thanks for your valuable suggestion. The higher magnification (up to 50 times) of  $\text{SO}_2$  reported by Liu et al. (2016) might be related to the different precursor

systems (gasoline vehicle exhaust), higher initial mixing ratios of precursors (2.2–4.3 ppm) and higher concentration of NO<sub>x</sub> (300–450 ppb) (Liu et al., 2016). There were difference in the VOCs composition between evaporative emissions and gasoline vehicle exhaust, especially the aromatic and IVOCs (Liu et al., 2017). Our recent study demonstrated that SOA formation could be significantly enhanced by the increase of aromatic content (Chen et al., 2019). Previous studies have also demonstrated that those unspiciated organic emissions (e.g., IVOCs) from gasoline vehicle exhaust have a significant contribution to SOA formation (Jathar et al., 2014; Gordon et al., 2014). Meanwhile, for the gasoline vehicle exhaust reaction systems reported by Liu et al. (2016), a small amount of POA was also present in the initial reaction systems. These enhanced SOA formation and the pre-existing POA would provide larger surface areas for the condensation and heterogeneous uptake of low-volatility vapors (e.g., gaseous H<sub>2</sub>SO<sub>4</sub>), then promoting a higher magnification in particle number concentrations in the presence of SO<sub>2</sub>.

As for the discrepancy between the magnification of particle number concentrations and SO<sub>2</sub> concentrations, on one hand, there might be some particles, especially nanoclusters, were lost to the chamber wall and not be detected; on the other hand, the gaseous H<sub>2</sub>SO<sub>4</sub> generated from the presence of high concentrations of SO<sub>2</sub> would contribute to the nanoclusters formation (Chu et al., 2019; Sipilä et al., 2010), and then grow to sizes large enough be detected. While the initial size of nanoclusters (sub-3 nm) might be too small to be detected by our general SMPS. That is to say, the particle number concentrations measured by our SMPS might be the particles after



growing up by collision. This could be supported by the enhancement in the particle diameters (144–172 nm) and sulfate concentrations (13–38  $\mu\text{g m}^{-3}$ ) with the increased concentration of  $\text{SO}_2$ . After considering the underestimation of particles formation (factor of 1.97–2.82), which was evaluated according to the methods described by Zhang et al. (2014) (seen in Section 2.3), the sulfate concentrations will be enhanced by a factor of 5.8 when comparing between experiments SGN 1 and SGN 4.

**Revision in the manuscript:**

**Lines 244-254, Add:** “This higher magnification of  $\text{SO}_2$  might be related to the different VOCs composition between evaporative emissions and gasoline vehicle exhaust, especially the aromatic and IVOCs (Liu et al., 2017). Our recent study demonstrated that SOA formation could be significantly enhanced by the increase of aromatic content (Chen et al., 2019b). Those unspciated organic emissions (e.g., IVOCs) from gasoline vehicle exhaust would also have a significant contribution to SOA formation (Jathar et al., 2014; Gordon et al., 2014). Moreover, a small amount of POA was present in the initial reaction systems in Liu et al. (2016). These enhanced SOA formation and the pre-existing POA would provide larger surface areas for the condensation and heterogeneous uptake of low-volatility vapors (e.g., gaseous  $\text{H}_2\text{SO}_4$ ), then promoting a higher magnification in particle number concentrations in the presence of  $\text{SO}_2$ . The higher initial mixing ratios of precursors (2.2–4.3 ppm) was also present in the reaction systems conducted by Liu et al. (2016), which would further be beneficial to the SOA formation.”

**Lines 266-276, Add:** “Additionally, it is worth noting that there was a discrepancy

between the magnification of particle number concentrations, surface areas and SO<sub>2</sub> concentrations. On one hand, there might be some particles, especially nanoclusters, were lost to the chamber wall and not be detected; on the other hand, the initial size of nanoclusters contributed from gaseous H<sub>2</sub>SO<sub>4</sub> was small enough (sub-3 nm) (Chu et al., 2019; Sipilä et al., 2010) and couldn't be detected by our general SMPS. That is to say, the particle number concentrations and surface areas measured by our SMPS might be the particles after growing up by collision. This could be supported by the enhancement in the particle diameters (144–172 nm) and sulfate concentrations (13–38 µg m<sup>-3</sup>) in the presence of SO<sub>2</sub>. After considering the underestimation of particles formation (factor of 1.97–2.82, seen in Section 2.3), the sulfate concentrations will be enhanced by a factor of 5.8 when comparing between experiments SGN 1 and SGN 4.”

**Comment 10:** Lines 227-232: This is in line with my previous comments. How do they explain such a moderate increase between SGN 1 and 4?

**Response:** Thanks for your valuable suggestion. The gaseous H<sub>2</sub>SO<sub>4</sub> generated from the presence of high concentrations of SO<sub>2</sub> would contribute to the nanoclusters formation (Chu et al., 2019; Sipilä et al., 2010), and then grow to sizes large enough be detected. While the initial size of nanoclusters (sub-3 nm) might be too small to be detected by our general SMPS. That is to say, the particle surface areas measured by our SMPS might be the particles after growing up by collision. This could be supported by the enhancement in the particle diameters (144–172 nm) and sulfate concentrations (13–38 µg m<sup>-3</sup>) in the presence of SO<sub>2</sub>. After considering the underestimation of

particles formation (factor of 1.97–2.82), which was evaluated according to the methods described by Zhang et al. (2014) (seen in Section 2.3), the sulfate concentrations will be enhanced by a factor of 5.8 when comparing between experiments SGN 1 and SGN 4.

**Revision in the manuscript:**

**Lines 266-276, Add:** “Additionally, it is worth noting that there was a discrepancy between the magnification of particle number concentrations, surface areas and SO<sub>2</sub> concentrations. On one hand, there might be some particles, especially nanoclusters, were lost to the chamber wall and not be detected; on the other hand, the initial size of nanoclusters contributed from gaseous H<sub>2</sub>SO<sub>4</sub> was small enough (sub-3 nm) (Chu et al., 2019; Sipilä et al., 2010) and couldn’t be detected by our general SMPS. That is to say, the particle number concentrations and surface areas measured by our SMPS might be the particles after growing up by collision. This could be supported by the enhancement in the particle diameters (144–172 nm) and sulfate concentrations (13–38 μg m<sup>-3</sup>) in the presence of SO<sub>2</sub>. After considering the underestimation of particles formation (factor of 1.97–2.82, seen in Section 2.3), the sulfate concentrations will be enhanced by a factor of 5.8 when comparing between experiments SGN 1 and SGN 4.”

**Comment 11:** Lines 245-246: Which compounds are the authors referring to? Products from heterogeneous reactions or Aldehydes? In both cases, the sentence should be revised. (i) products formed in the particle phase cannot partition as they are already in the condensed phase and second the aldehydes are not considered as low vapor pressure

compounds (Kroll and Seinfeld, 2008).

**Response:** Thanks for your valuable suggestion. These products referred to products generated through the acid-catalyzed heterogeneous reactions. The sentences in Lines 245–246 have been modified in the revised manuscript.

**Revision in the manuscript:**

**Lines 288-289, Change:** “These low-vapor-pressure products preferentially partition into the particle phase and subsequently contribute to the SOA formation” to “**These low-vapor-pressure products generated from heterogeneous reactions preferentially contribute to the SOA formation**”

**Line 289, Add reference:** “**Kroll and Seinfeld, 2008**”

**Comment 12:** Lines 249-253: Before speculating on the potential formation of organosulfur the authors should present/discuss the validation of the AMS results: calibration of the AMS, uncertainties of the measurements, SMPS vs AMS data,... This is important in order to claim a large formation of organosulfur.

**Response:** Thanks for your valuable suggestion. More details about the validation of the HR-ToF-AMS results has been added in the Materials and Methods section.

**Revision in the manuscript:**

**Lines 145-153, Add:** “**For all experiments, the HR-ToF-AMS operated in a cycle including two modes, 3 min V mode and 2 min W mode. Specifically, V mode (higher signal) can obtain the mass concentrations of the aerosols and W mode (higher resolution) can obtain high resolution mass spectral data. The inlet flow rate, ionization**

efficiency (IE), and particle sizing were calibrated according to the standard protocols (Drewnick et al., 2005; Jimenez et al., 2003c; Jayne et al., 2000), using the size-selected pure ammonium nitrate (AN) particles. All HR-ToF-AMS data were analyzed with ToF-AMS analysis toolkit SQUIRREL 1.57I/PIKA 1.16I version, in Igor Pro Version 6.37. HR-ToF-AMS results were also corrected using the mass concentration derived from SMPS according to the same method as Gordon et al. (2014), details of this correction are shown in the Supplement.”

**Supplement**, details of the HR-ToF-AMS correction have been added as follows:

### **S1. AMS Corrections: Comparison with SMPS Measurements**

Theoretically, the sum of the secondary aerosol (SA) mass measured by HR-ToF-AMS should be equal to the mass calculated from the SMPS size distributions. However, both methods have their limitations, in which SMPS measures particle mobility diameter, while HR-ToF-AMS measures mass. Therefore, particle shape and density must be assumed before converting SMPS measurements to mass. Here, we assume that particles are spherical, and the density of SA were calculated from the equation  $\rho = d_{va}/d_m$ , where  $d_{va}$  is the mean vacuum aerodynamic diameter measured by an HR-ToF-AMS and  $d_m$  is the mean electrical mobility diameter measured by SMPS (DeCarlo et al., 2004). However, fractal-like particles will cause the SMPS to overestimate the spherical equivalent diameter and therefore overestimate the particle mass. While, HR-ToF-AMS tends to underestimate the SA mass due to the transmission efficiency (Liu et al., 2007) and collection efficiency (Takegawa et al., 2005).

For all the experiments with the discrepancies between HR-ToF-AMS and SMPS,

we assume that the difference in mass has the same chemical composition as the measured chemical species (i.e., organics, nitrate, sulfate, and ammonium). And then a scaling factor ( $AMS_{sf}$ ) was calculated for each experiment to correct the SA mass measured by HR-ToF-AMS and close the gap with the SMPS measurement. The scaling factor could be calculated as following equation:

$$AMS_{sf} = \frac{C_{SMPS}}{C_{Org} + C_{NO_3} + C_{SO_4} + C_{NH_4}}$$

in which  $C_{SMPS}$  is the SA mass concentration derived from SMPS,  $C_{Org}$ ,  $C_{NO_3}$ ,  $C_{SO_4}$  and  $C_{NH_4}$  are the mass concentrations of organics, nitrate, sulfate, and ammonium measured by HR-ToF-AMS, respectively. The  $AMS_{sf}$  for each time step after wall loss correction is calculated and used to scale the AMS data for the entire experiment. For all the experiments the average  $AMS_{sf}$  ranged from 1.09 to 1.23.

**Comment 13:** Lines 265-270: In other words, the large gap between  $SO_2$  and  $SO_4$  cannot be explained by the organosulfur. The authors should not speculate something and a few lines after conclude that is not the case. In Fig S8, the difference should be tens of  $\mu g m^{-3}$  while the authors estimated the formation organosulfur of a few tens of  $ng m^{-3}$ .

**Response:** Thanks for your valuable suggestion. Indeed, the large gap between the amount of consumed  $SO_2$  and concentration of formed  $SO_4^{2-}$  cannot be explained by the organosulfur. We think there might be caused by many reasons as follows:

First, the sulfur-containing organics concentration in our study might be underestimated by the HR-ToF-AMS when considering one cannot resolve all the sulfur-containing

fragments that may exist, and some of the sulfur-containing organics might fragment into masses that do not contain sulfur and thus are quantified as organic. Furthermore, the relative ionization efficiency (RIE) for the sulfur-containing organics fragments was assumed to be equivalent to the remainder of the organics (1.3), since a RIE value for sulfur-containing organics is unknown. This may introduce an additional uncertainty to the quantitation of sulfur-containing organics. Therefore, the estimated concentrations of sulfur-containing organics using HR-ToF-AMS were a conservative lower-bound.

Secondary, sulfur species may exist in the form of gaseous sulfuric acid ( $\text{H}_2\text{SO}_4$ ) and could not be detected in our laboratory. In fact, it can be measured using a chemical ionization long time-of-flight mass spectrometer (LToF-CIMS, Aerodyne Research, Inc.). Unfortunately, the LToF-CIMS is unavailable in our laboratory. Meanwhile, the deposition and heterogeneous reaction of sulfur species (e.g., sulfate and gaseous sulfuric acid) on the wall might be underestimated in our study.

In order to more directly explain the presence of sulfur-containing organics, we refer to your and the first reviewer's comment (comment 15), the S-bearing organic fragments ( $\text{C}_x\text{H}_y\text{O}_z\text{S}$ ) detected by HR-ToF-AMS were used to prove the presence of sulfur-containing organics.

**Revision in the manuscript:**

**Line 292, Delete:** “According to the linear fitting between the concentration of formed  $\text{SO}_4^{2-}$  and the amount of consumed  $\text{SO}_2$  (after wall loss correction for  $\text{SO}_2$ , sulfuric acid gas and sulfate), there was a large gap between the slope of the line and the ratio of  $M(\text{SO}_4^{2-})$  and  $M(\text{SO}_2)$ , as shown in Fig. S8. There are some possible reasons for this,

including the underestimation of deposition and heterogeneous reaction of sulfur species on the wall, the formation of organic sulfur-containing products, and small leaks of pollutants from the smog chamber.”

**Supplement, Delete:** Fig. S8.

**Line 307, Add:** “conservative lower-bound”

**Lines 309-316, Add:** “Additionally, it should be noted that the sulfur-containing organics concentration in this study might be underestimated by the HR-ToF-AMS when considering one cannot resolve all the sulfur-containing fragments that may exist, and some of the sulfur-containing organics might fragment into masses that do not contain sulfur and thus are quantified as organic. Furthermore, the relative ionization efficiency (RIE) for the sulfur-containing organics fragments was assumed to be equivalent to the remainder of the organics (1.3), since a RIE value for sulfur-containing organics is unknown. This may introduce an additional uncertainty to the quantitation of sulfur-containing organics.”

**Comment 14:** Lines 387-388: The O/C ratio didn’t change significantly so I do not think the authors can claim to the formation of highly oxidized species.

**Response:** Thanks for your comment. You are right. Indeed, the O/C didn’t change significantly for the SOA generated under the different concentration of NH<sub>3</sub>. The formation of highly oxidized species is relatively speaking when comparing the Factor 1-N and Factor 2-N. Factor 2-N has a relatively higher O/C (O/C = 0.44) and oxidation state (OSc = -0.42) than Factor 1-N (O/C = 0.32, OSc = -0.57). In order to avoid this



misunderstanding, this description has been corrected in the revised manuscript.

**Revision in the manuscript:**

**Lines 438-439, Change “highly oxidized species” To “more oxidized species”**

References:

Alfarra, M. R., Paulsen, D., Gysel, M., Garforth, A. A., Dommen, J., Prévôt, A. S. H., Worsnop, D. R., Baltensperger, U., and Coe, H.: A mass spectrometric study of secondary organic aerosols formed from the photooxidation of anthropogenic and biogenic precursors in a reaction chamber, *Atmos. Chem. Phys.*, 6, 5279-5293, doi: 10.5194/acp-6-5279-2006, 2006.

Bahreini, R., Keywood, M. D., Ng, N. L., Varutbangkul, V., Gao, S., Flagan, R. C., Seinfeld, J. H., Worsnop, D. R., and Jimenez, J. L.: Measurements of secondary organic aerosol from oxidation of cycloalkenes, terpenes, and m-xylene using an Aerodyne aerosol mass spectrometer, *Environ. Sci. Technol.*, 39, 5674-5688, doi: 10.1021/es048061a, 2005.

Chen, T., Liu, Y., Liu, C., Liu, J., Chu, B., and He, H.: Important role of aromatic hydrocarbons in SOA formation from unburned gasoline vapor, *Atmos. Environ.*, 201, 101-109, doi: 10.1016/j.atmosenv.2019.01.001, 2019.

Chu, B., Zhang, X., Liu, Y., He, H., Sun, Y., Jiang, J., Li, J., and Hao, J.: Synergetic formation of secondary inorganic and organic aerosol: effect of SO<sub>2</sub> and NH<sub>3</sub> on particle formation and growth, *Atmos. Chem. Phys.*, 16, 14219-14230, doi: 10.5194/acp-16-14219-2016, 2016.

Chu, B., Kerminen, V. M., Bianchi, F., Yan, C., Petäjä, T., and Kulmala, M.: Atmospheric new particle formation in China, *Atmos. Chem. Phys.*, 19, 115-138, doi: 10.5194/acp-19-115-2019, 2019.

Czochke, N. M., Jang, M., and Kamens, R. M.: Effect of acidic seed on biogenic secondary organic aerosol growth, *Atmos. Environ.*, 37, 4287-4299, doi: 10.1016/S1352-2310(03)00511-9, 2003.

DeCarlo, P. F., Slowik, J. G., Worsnop, D. R., Davidovits, P., and Jimenez, J. L.: Particle morphology and density characterization by combined mobility and aerodynamic diameter measurements. Part 1: Theory, *Aerosol Sci. Tech.*, 38, 1185-1205, doi: 10.1080/027868290903907, 2004.

Donahue, N. M., Robinson, A. L., Stanier, C. O., and Pandis, S. N.: Coupled partitioning, dilution, and chemical aging of semivolatile organics, *Environ. Sci. Technol.*, 40, 2635-2643, doi: 10.1021/es052297c, 2006.

Drewnick, F., Hings, S. S., DeCarlo, P., Jayne, J. T., Gonin, M., Fuhrer, K., Weimer, S., Jimenez, J. L., Demerjian, K. L., Borrmann, S., and Worsnop, D. R.: A new time-of-flight aerosol mass spectrometer (TOF-AMS)—instrument description and first field deployment, *Aerosol Sci. Tech.*, 39, 637-658, doi: 10.1080/02786820500182040, 2005.

Edney, E. O., Kleindienst, T. E., Jaoui, M., Lewandowski, M., Offenberg, J. H., Wang, W., and Claeys, M.: Formation of 2-methyl tetrols and 2-methylglyceric acid in secondary organic aerosol from laboratory irradiated isoprene/NO<sub>x</sub>/SO<sub>2</sub>/air mixtures and their detection in ambient PM<sub>2.5</sub> samples collected in the eastern United States, *Atmos. Environ.*, 39, 5281-5289, doi: 10.1016/j.atmosenv.2005.05.031, 2005.

Gordon, T. D., Presto, A. A., May, A. A., Nguyen, N. T., Lipsky, E. M., Donahue, N. M., Gutierrez, A., Zhang, M., Maddox, C., Rieger, P., Chattopadhyay, S., Maldonado, H., Maricq, M. M., and Robinson, A. L.: Secondary organic aerosol formation exceeds primary particulate matter emissions for light-duty gasoline vehicles, *Atmos. Chem. Phys.*, 14, 4661-4678, doi: 10.5194/acp-14-4661-2014, 2014.

Ianniello, A., Spataro, F., Esposito, G., Allegrini, I., Rantica, E., Ancora, M. P., Hu, M., and Zhu, T.: Occurrence of gas phase ammonia in the area of Beijing (China), *Atmos. Chem. Phys.*, 10, 9487-9503, doi: 10.5194/acp-10-9487-2010, 2010.

Jang, M., and Kamens, R. M.: Atmospheric secondary aerosol formation by heterogeneous reactions of aldehydes in the presence of a sulfuric acid aerosol catalyst, *Environ. Sci. Technol.*, 35, 4758-4766, doi: 10.1021/es010790s, 2001.

Jang, M., Czoschke, N. M., Lee, S., and Kamens, R. M.: Heterogeneous atmospheric aerosol production by acid-catalyzed particle-phase reactions, *Science*, 298, 814-817, doi: 10.1126/science.1075798, 2002.

Jang, M., Carroll, B., Chandramouli, B., and Kamens, R. M.: Particle growth by acid-catalyzed heterogeneous reactions of organic carbonyls on preexisting aerosols, *Environ. Sci. Technol.*, 37, 3828-3837, doi: 10.1021/es021005u, 2003a.

Jang, M., Lee, S., and Kamens, R. M.: Organic aerosol growth by acid-catalyzed heterogeneous reactions of octanal in a flow reactor, *Atmos. Environ.*, 37, 2125-2138, doi: 10.1016/S1352-2310(03)00077-3, 2003b.

Jaoui, M., Edney, E. O., Kleindienst, T. E., Lewandowski, M., Offenberg, J. H., Surratt, J. D., and Seinfeld, J. H.: Formation of secondary organic aerosol from

irradiated  $\alpha$ -pinene/toluene/ $\text{NO}_x$  mixtures and the effect of isoprene and sulfur dioxide, *J. Geophys. Res.-Atmos.*, 113, doi: 10.1029/2007jd009426, 2008.

Jathar, S. H., Gordon, T. D., Hennigan, C. J., Pye, H. O. T., Pouliot, G., Adams, P. J., Donahue, N. M., and Robinson, A. L.: Unspeciated organic emissions from combustion sources and their influence on the secondary organic aerosol budget in the United States, *Proc. Natl. Acad. Sci. USA*, 111, 10473-10478, doi: 10.1073/pnas.1323740111, 2014.

Jayne, J. T., Leard, D. C., Zhang, X., Davidovits, P., Smith, K. A., Kolb, C. E., and Worsnop, D. R.: Development of an aerosol mass spectrometer for size and composition analysis of submicron particles, *Aerosol Sci. Tech.*, 33, 49-70, doi: 10.1080/027868200410840, 2000.

Jimenez, J. L., Bahreini, R., Cocker, D. R., Zhuang, H., Varutbangkul, V., Flagan, R. C., Seinfeld, J. H., O'Dowd, C. D., and Hoffmann, T.: New particle formation from photooxidation of diiodomethane ( $\text{CH}_2\text{I}_2$ ), *J. Geophys. Res.-Atmos.*, 108, doi: 10.1029/2002jd002452, 2003a.

Jimenez, J. L., Bahreini, R., Cocker III, D. R., Zhuang, H., Varutbangkul, V., Flagan, R. C., Seinfeld, J. H., O'Dowd, C. D., and Hoffmann, T.: Correction to "New particle formation from photooxidation of diiodomethane ( $\text{CH}_2\text{I}_2$ )", *J. Geophys. Res.-Atmos.*, 108, doi: 10.1029/2003jd004249, 2003b.

Jimenez, J. L., Jayne, J. T., Shi, Q., Kolb, C. E., Worsnop, D. R., Yourshaw, I., Seinfeld, J. H., Flagan, R. C., Zhang, X., Smith, K. A., Morris, J. W., and Davidovits, P.: Ambient aerosol sampling using the aerodyne aerosol mass spectrometer, *J. Geophys.*

Res.-Atmos., 108, doi: 10.1029/2001JD001213, 2003c.

Kang, Y., Liu, M., Song, Y., Huang, X., Yao, H., Cai, X., Zhang, H., Kang, L., Liu, X., Yan, X., He, H., Zhang, Q., Shao, M., and Zhu, T.: High-resolution ammonia emissions inventories in China from 1980 to 2012, *Atmos. Chem. Phys.*, 16, 2043-2058, doi: 10.5194/acp-16-2043-2016, 2016.

Kleindienst, T. E., Edney, E. O., Lewandowski, M., Offenberg, J. H., and Jaoui, M.: Secondary organic carbon and aerosol yields from the irradiations of isoprene and  $\alpha$ -pinene in the presence of  $\text{NO}_x$  and  $\text{SO}_2$ , *Environ. Sci. Technol.*, 40, 3807-3812, doi: 10.1021/es052446r, 2006.

Kroll, J. H., and Seinfeld, J. H.: Chemistry of secondary organic aerosol: Formation and evolution of low-volatility organics in the atmosphere, *Atmos. Environ.*, 42, 3593-3624, doi: 10.1016/j.atmosenv.2008.01.003, 2008.

Li, K., Chen, L., White, S. J., Yu, H., Wu, X., Gao, X., Azzi, M., and Cen, K.: Smog chamber study of the role of  $\text{NH}_3$  in new particle formation from photo-oxidation of aromatic hydrocarbons, *Sci. Total Environ.*, 619-620, 927-937, doi: 10.1016/j.scitotenv.2017.11.180, 2018.

Liggio, J., and Li, S. M.: Reactive uptake of pinonaldehyde on acidic aerosols, *J. Geophys. Res.-Atmos.*, 111, doi: 10.1029/2005JD006978, 2006.

Lim, Y. B., and Ziemann, P. J.: Products and mechanism of secondary organic aerosol formation from reactions of n-alkanes with OH radicals in the presence of  $\text{NO}_x$ , *Environ. Sci. Technol.*, 39, 9229-9236, doi: 10.1021/es051447g, 2005.

Lin, Y. H., Knipping, E. M., Edgerton, E. S., Shaw, S. L., and Surratt, J. D.:

Investigating the influences of SO<sub>2</sub> and NH<sub>3</sub> levels on isoprene-derived secondary organic aerosol formation using conditional sampling approaches, *Atmos. Chem. Phys.*, 13, 8457-8470, doi: 10.5194/acp-13-8457-2013, 2013.

Liu, H., Man, H., Cui, H., Wang, Y., Deng, F., Wang, Y., Yang, X., Xiao, Q., Zhang, Q., Ding, Y., and He, K.: An updated emission inventory of vehicular VOCs and IVOCs in China, *Atmos. Chem. Phys.*, 17, 12709-12724, doi: 10.5194/acp-17-12709-2017, 2017.

Liu, P. S. K., Deng, R., Smith, K. A., Williams, L. R., Jayne, J. T., Canagaratna, M. R., Moore, K., Onasch, T. B., Worsnop, D. R., and Deshler, T.: Transmission efficiency of an aerodynamic focusing lens system: Comparison of model calculations and laboratory measurements for the Aerodyne Aerosol Mass Spectrometer, *Aerosol Sci. Tech.*, 41, 721-733, doi: 10.1080/02786820701422278, 2007.

Liu, T., Wang, X., Hu, Q., Deng, W., Zhang, Y., Ding, X., Fu, X., Bernard, F., Zhang, Z., Lü, S., He, Q., Bi, X., Chen, J., Sun, Y., Yu, J., Peng, P., Sheng, G., and Fu, J.: Formation of secondary aerosols from gasoline vehicle exhaust when mixing with SO<sub>2</sub>, *Atmos. Chem. Phys.*, 16, 675-689, doi: 10.5194/acp-16-675-2016, 2016.

Liu, Y., Shao, M., Fu, L., Lu, S., Zeng, L., and Tang, D.: Source profiles of volatile organic compounds (VOCs) measured in China: Part I, *Atmos. Environ.*, 42, 6247-6260, doi: 10.1016/j.atmosenv.2008.01.070, 2008.

Liu, Y., Liggió, J., Staebler, R., and Li, S. M.: Reactive uptake of ammonia to secondary organic aerosols: kinetics of organonitrogen formation, *Atmos. Chem. Phys.*, 15, 13569-13584, doi: 10.5194/acp-15-13569-2015, 2015.

Ng, N. L., Kroll, J. H., Chan, A. W. H., Chhabra, P. S., Flagan, R. C., and Seinfeld, J. H.: Secondary organic aerosol formation from m-xylene, toluene, and benzene, *Atmos. Chem. Phys.*, 7, 3909-3922, doi: 10.5194/acp-7-3909-2007, 2007.

Pan, Y., Tian, S., Liu, D., Fang, Y., Zhu, X., Zhang, Q., Zheng, B., Michalski, G., and Wang, Y.: Fossil fuel combustion-related emissions dominate atmospheric ammonia sources during severe haze episodes: Evidence from  $^{15}\text{N}$ -stable isotope in size-resolved aerosol ammonium, *Environ. Sci. Technol.*, 50, 8049-8056, doi: 10.1021/acs.est.6b00634, 2016.

Presto, A. A., Miracolo, M. A., Kroll, J. H., Worsnop, D. R., Robinson, A. L., and Donahue, N. M.: Intermediate-volatility organic compounds: A potential source of ambient oxidized organic aerosol, *Environ. Sci. Technol.*, 43, 4744-4749, doi: 10.1021/es803219q, 2009.

Pye, H. O. T., and Pouliot, G. A.: Modeling the role of alkanes, polycyclic aromatic hydrocarbons, and their oligomers in secondary organic aerosol formation, *Environ. Sci. Technol.*, 46, 6041-6047, doi: 10.1021/es300409w, 2012.

Santiago, M., Garcia Vivanco, M., and Stein, A. F.:  $\text{SO}_2$  effect on secondary organic aerosol from a mixture of anthropogenic VOCs: experimental and modelled results, *Int. J. Environ. Pollut.*, 50, 224-233, doi: 10.1504/ijep.2012.051195, 2012.

Sato, K., Takami, A., Isozaki, T., Hikida, T., Shimono, A., and Imamura, T.: Mass spectrometric study of secondary organic aerosol formed from the photo-oxidation of aromatic hydrocarbons, *Atmos. Environ.*, 44, 1080-1087, doi: 10.1016/j.atmosenv.2009.12.013, 2010.

Sipilä, M., Berndt, T., Petäjä, T., Brus, D., Vanhanen, J., Stratmann, F., Patokoski, J., Mauldin, R. L., Hyvärinen, A.-P., Lihavainen, H., and Kulmala, M.: The role of sulfuric acid in atmospheric nucleation, *Science*, 327, 1243-1246, doi: 10.1126/science.1180315, 2010.

Takegawa, N., Miyazaki, Y., Kondo, Y., Komazaki, Y., Miyakawa, T., Jimenez, J. L., Jayne, J. T., Worsnop, D. R., Allan, J. D., and Weber, R. J.: Characterization of an Aerodyne aerosol mass spectrometer (AMS): intercomparison with other aerosol instruments, *Aerosol Sci. Tech.*, 39, 760-770, doi: 10.1080/02786820500243404, 2005.

Tkacik, D. S., Presto, A. A., Donahue, N. M., and Robinson, A. L.: Secondary organic aerosol formation from intermediate-volatility organic compounds: cyclic, linear, and branched alkanes, *Environ. Sci. Technol.*, 46, 8773-8781, doi: 10.1021/es301112c, 2012.

Yuan, B., Koss, A. R., Warneke, C., Coggon, M., Sekimoto, K., and de Gouw, J. A.: Proton-transfer-reaction mass spectrometry: Applications in atmospheric sciences, *Chem. Rev.*, 117, 13187-13229, doi: 10.1021/acs.chemrev.7b00325, 2017.

Zhang, Y., Wang, X., Zhang, Z., Lü, S., Shao, M., Lee, F. S. C., and Yu, J.: Species profiles and normalized reactivity of volatile organic compounds from gasoline evaporation in China, *Atmos. Environ.*, 79, 110-118, doi: 10.1016/j.atmosenv.2013.06.029, 2013.

Zhao, B., Wang, S., Donahue, N. M., Jathar, S. H., Huang, X., Wu, W., Hao, J., and Robinson, A. L.: Quantifying the effect of organic aerosol aging and intermediate-volatility emissions on regional-scale aerosol pollution in China, *Sci. Rep.*, 6, doi:



10.1038/srep28815, 2016.
